# Supplementary material
Source: ML conference proceedings conference paper supplement (https://openreview.net/forum?id=Seb4JPLjcec)

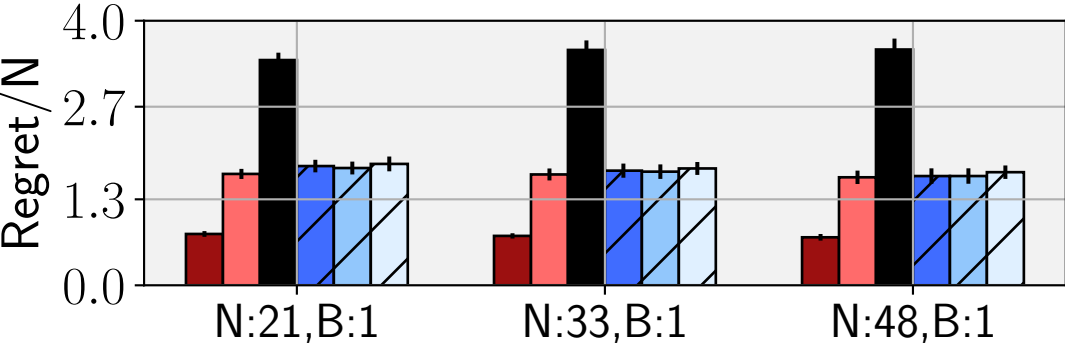

Supplement: supplementary_material [file attachment]

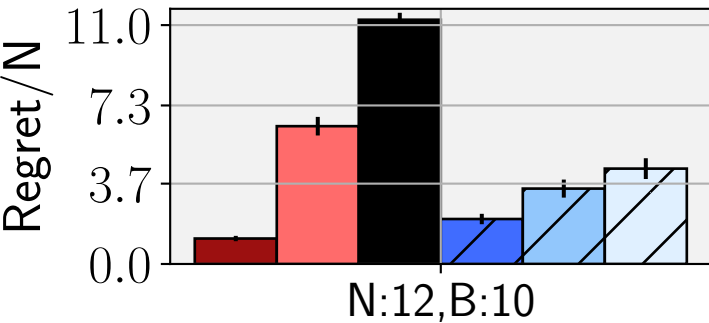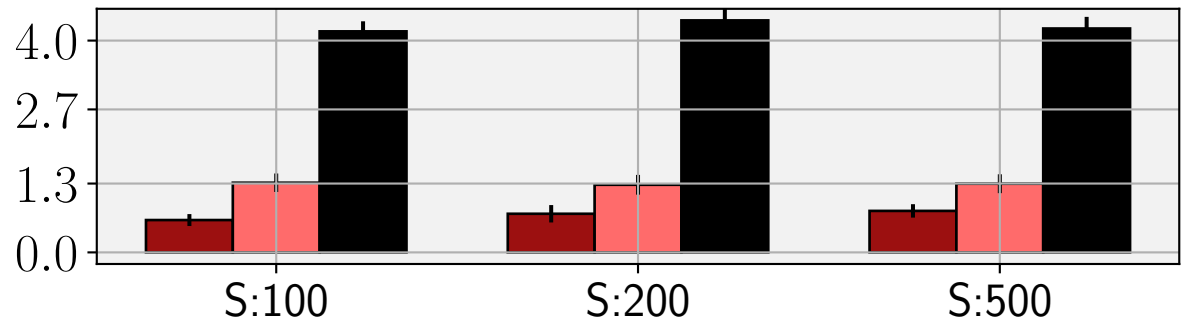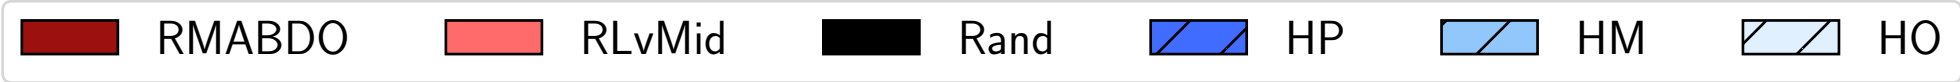

Supplement: supplementary_material [file attachment]

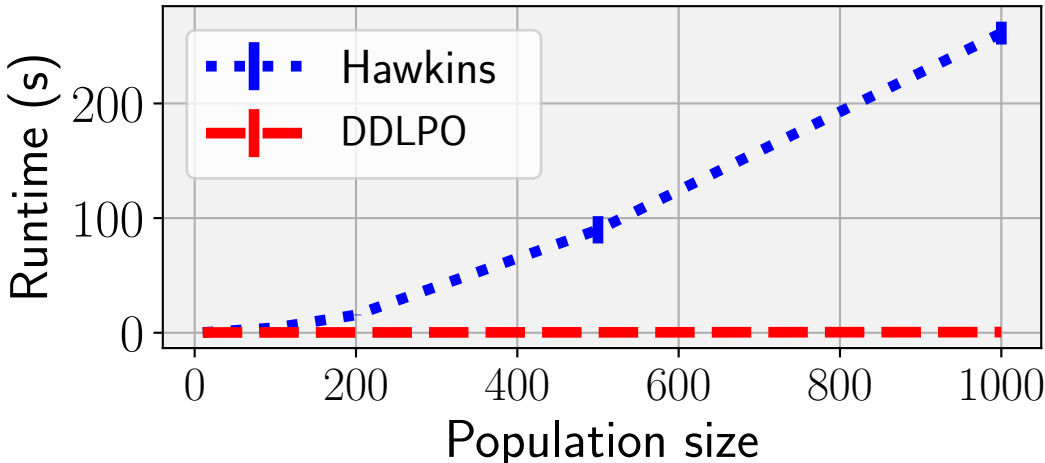

Supplement: supplementary_material [file attachment]

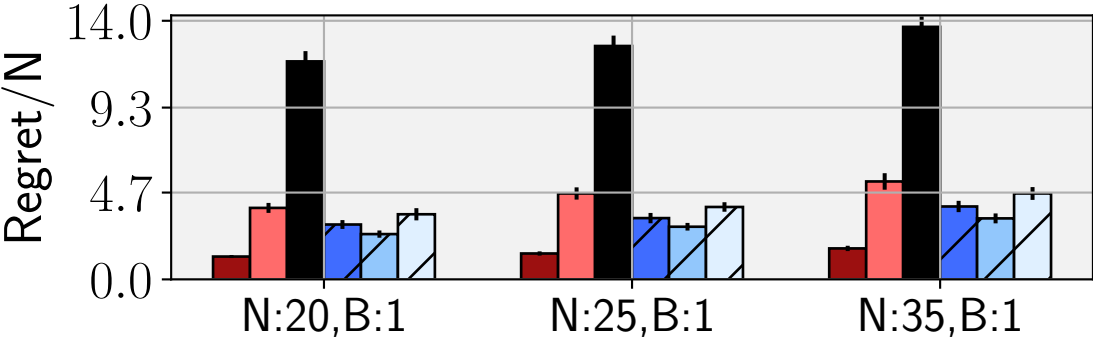

Supplement: supplementary_material [file attachment]

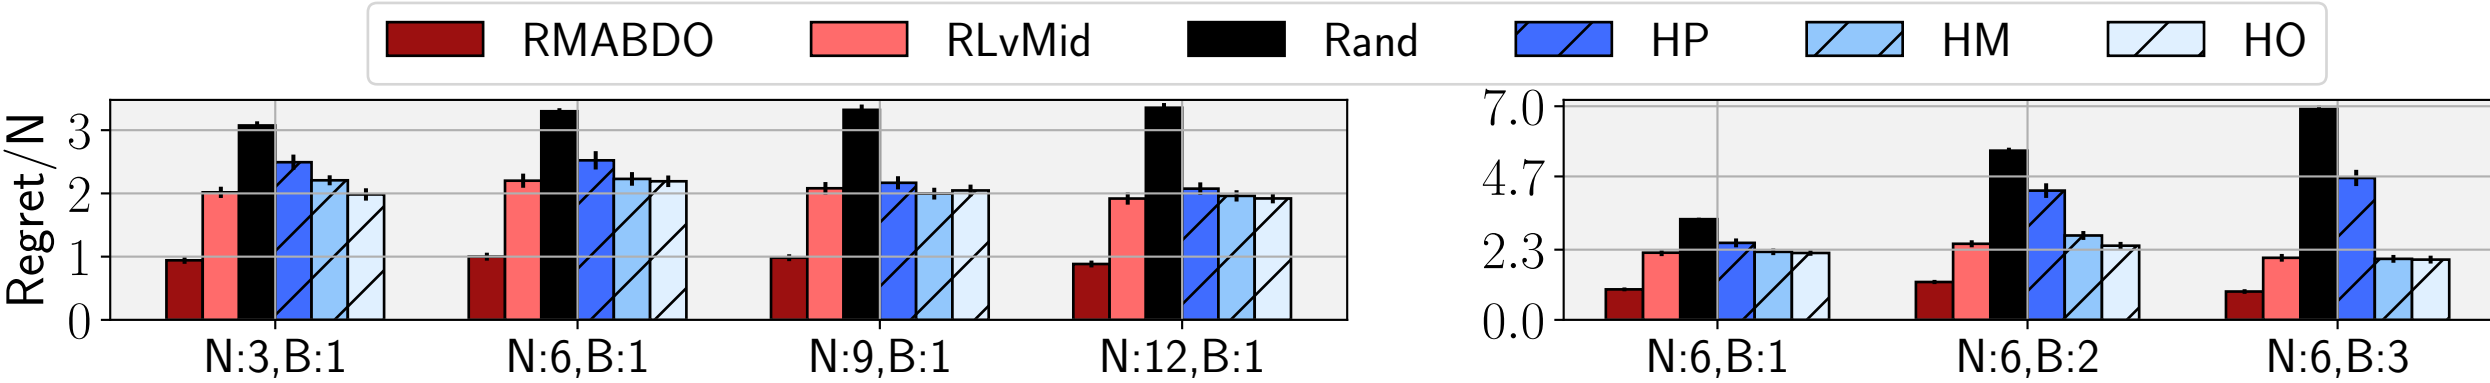

Supplement: supplementary_material [file attachment]

Regret/N

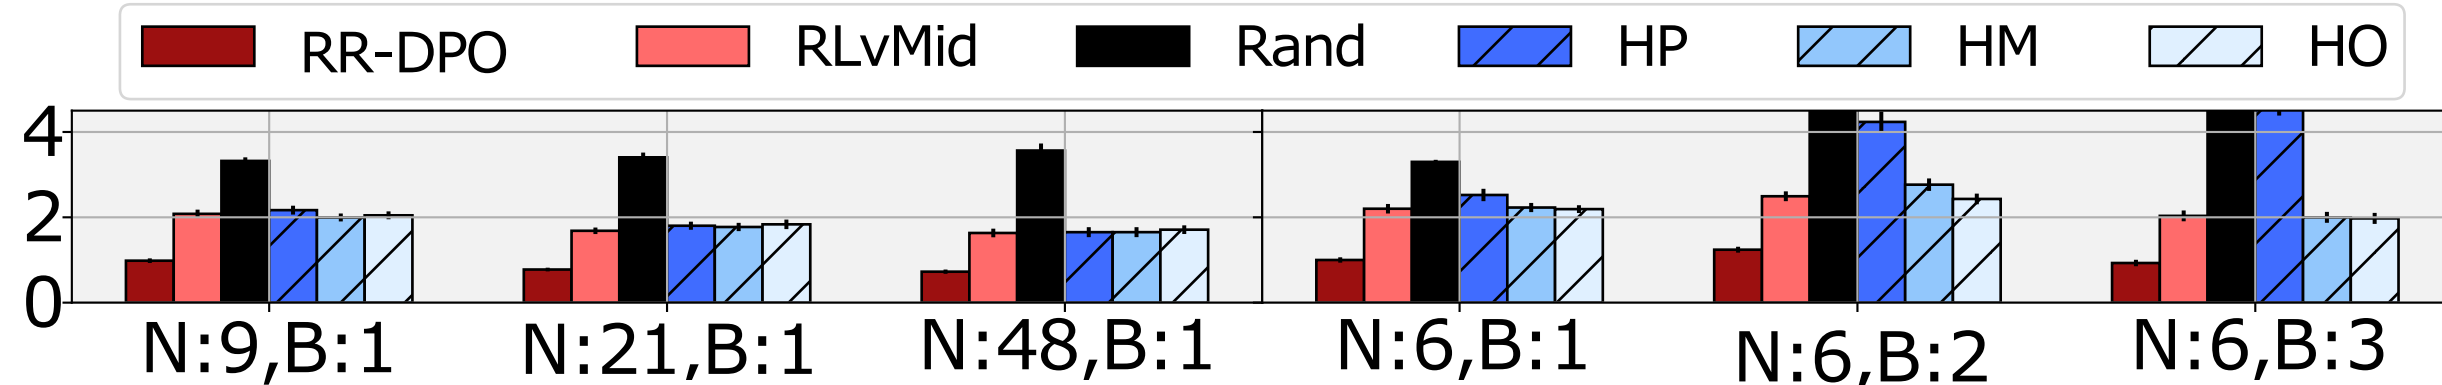

(a)

(b)

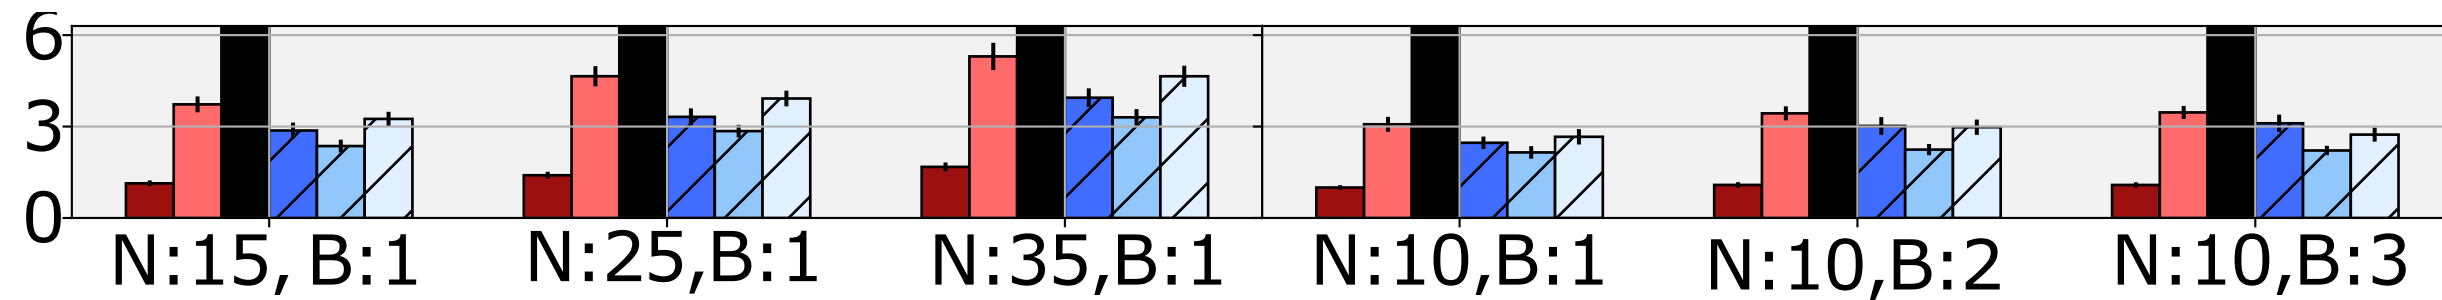

(c)

(d)

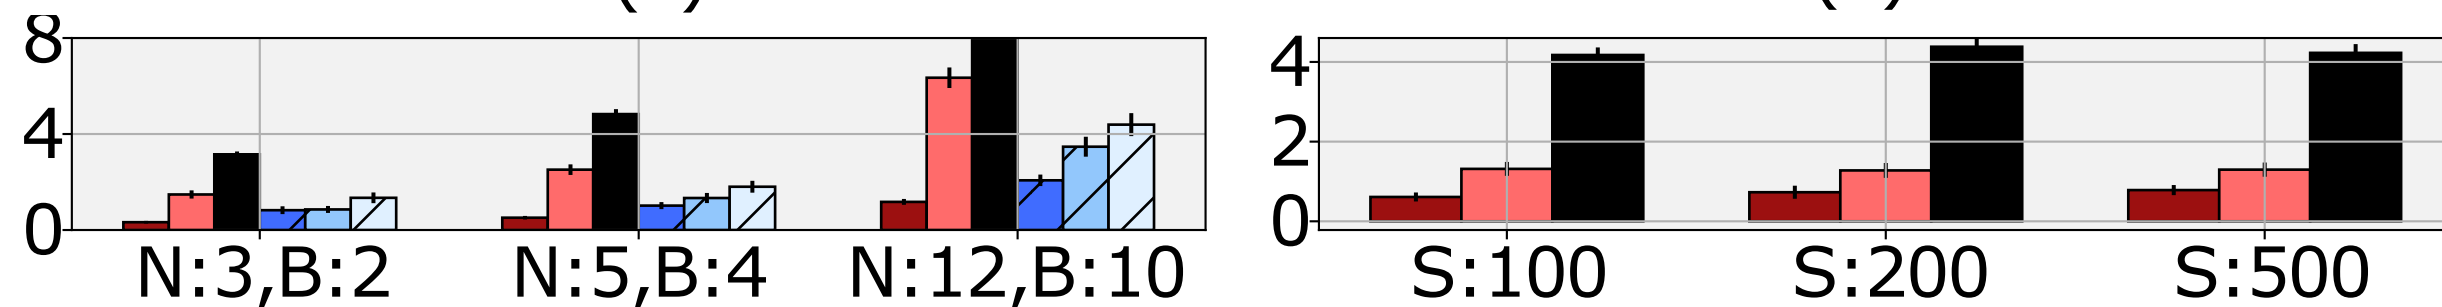

(e)

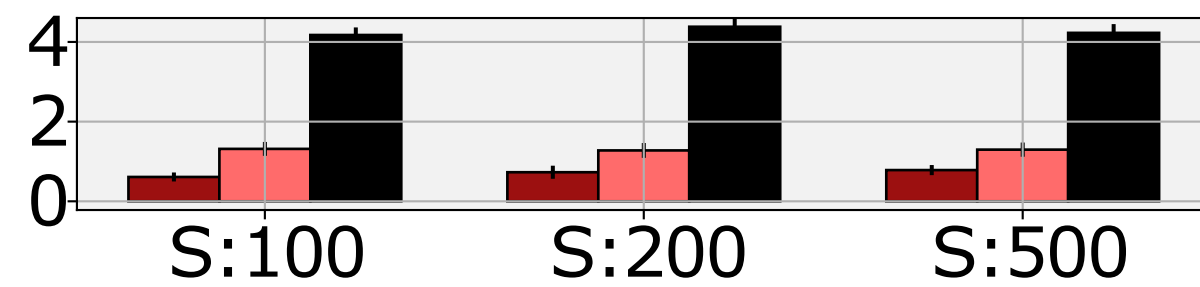

(f)

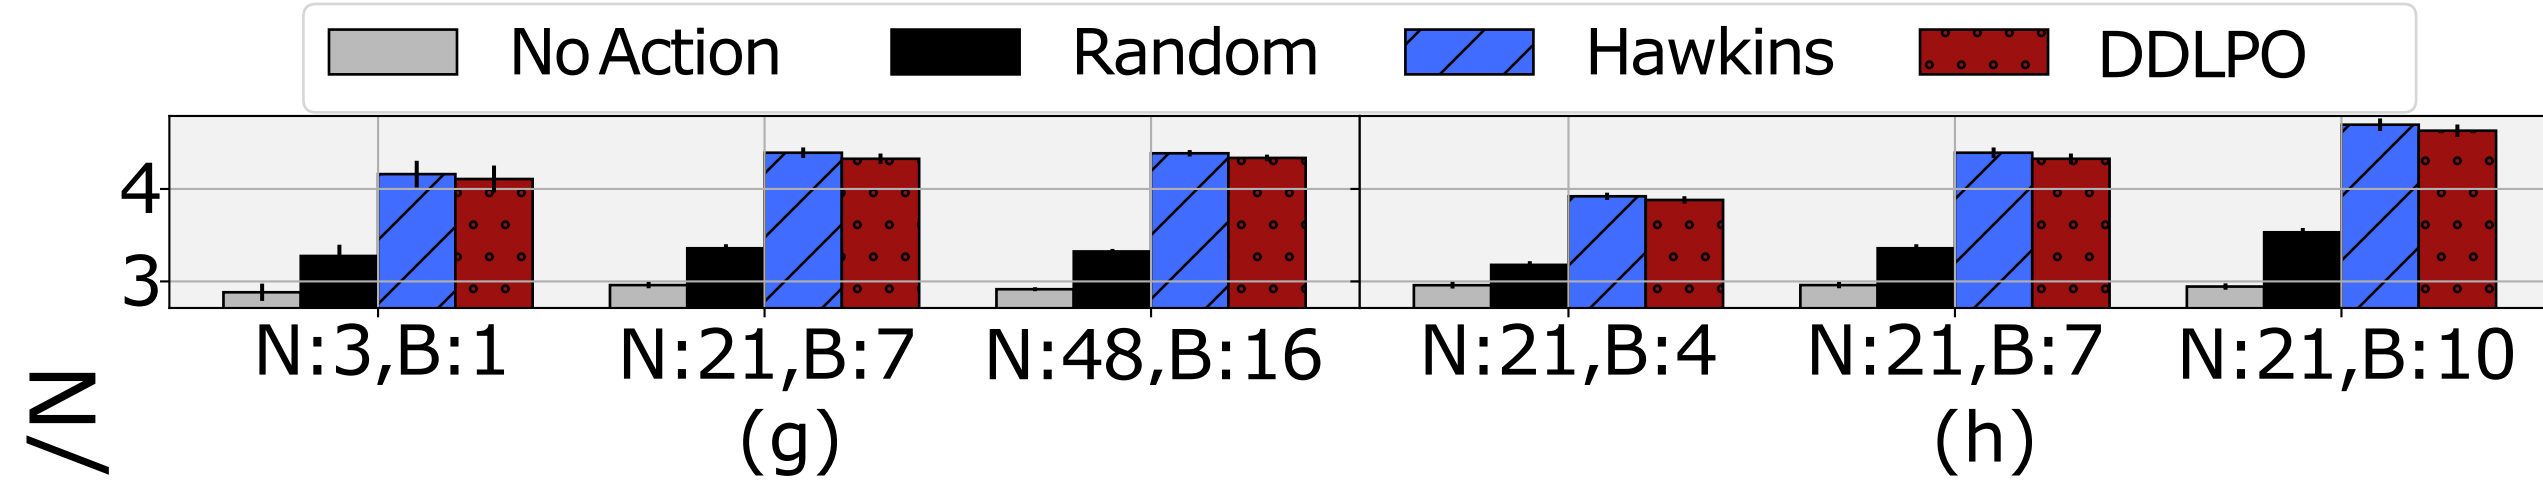

(g)

(h)

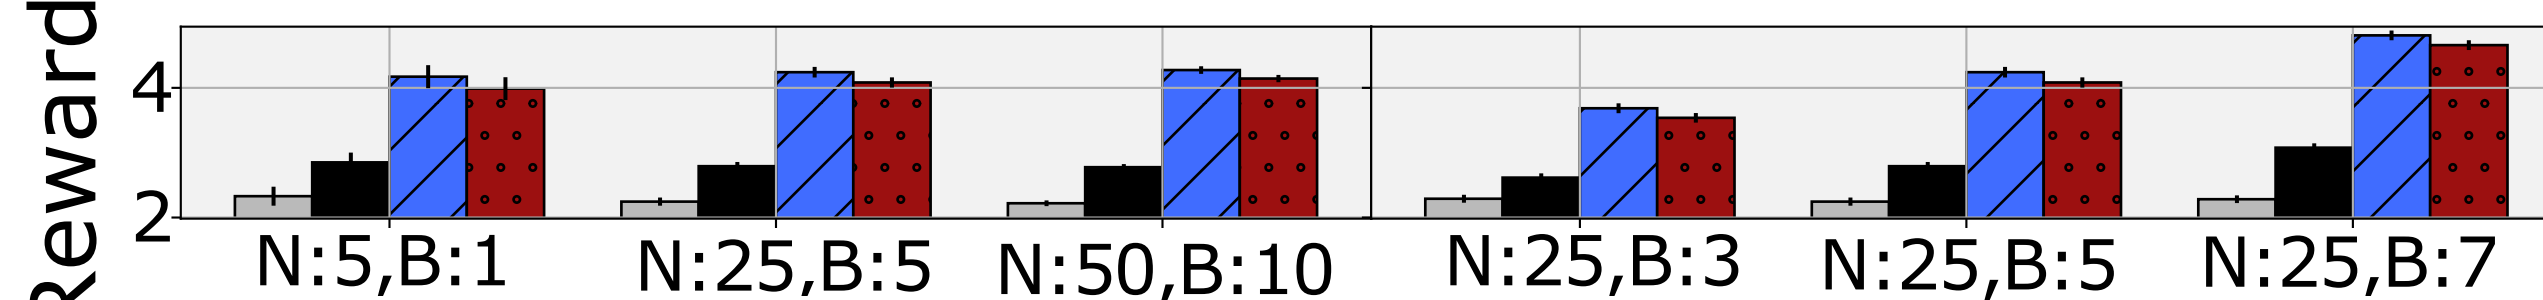

(i)

(j)

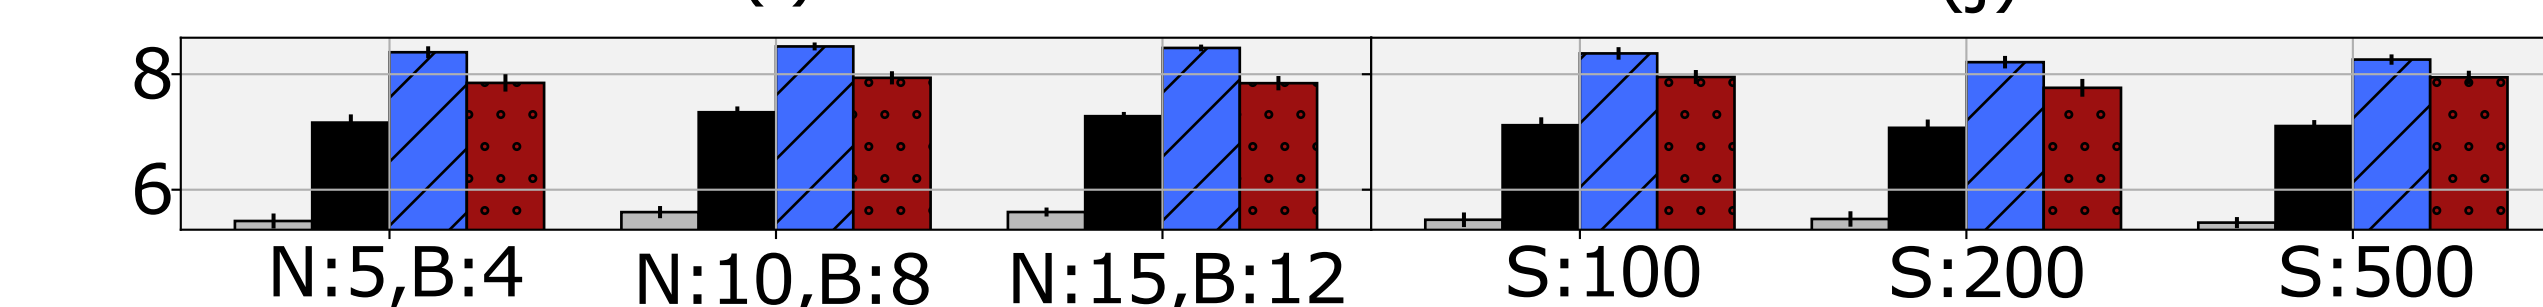

(k)

(l)

Reward/N

Supplement: supplementary_material [file attachment]

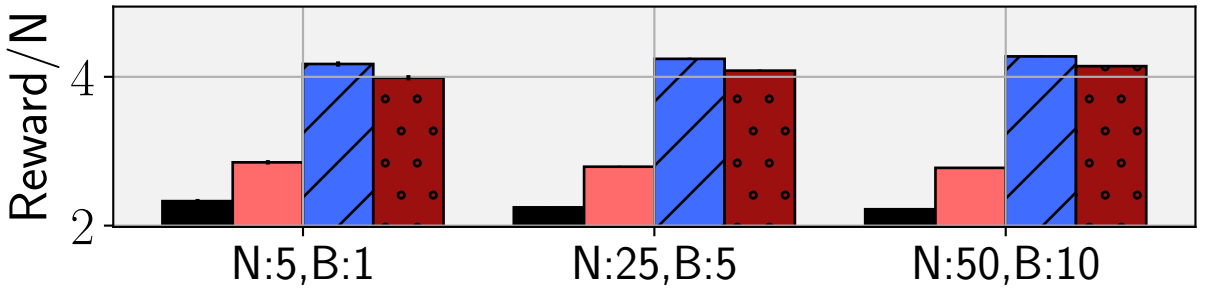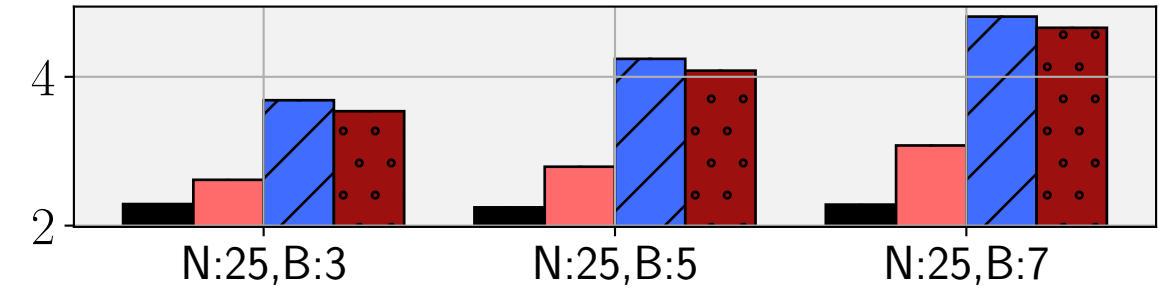

Supplement: supplementary_material [file attachment]

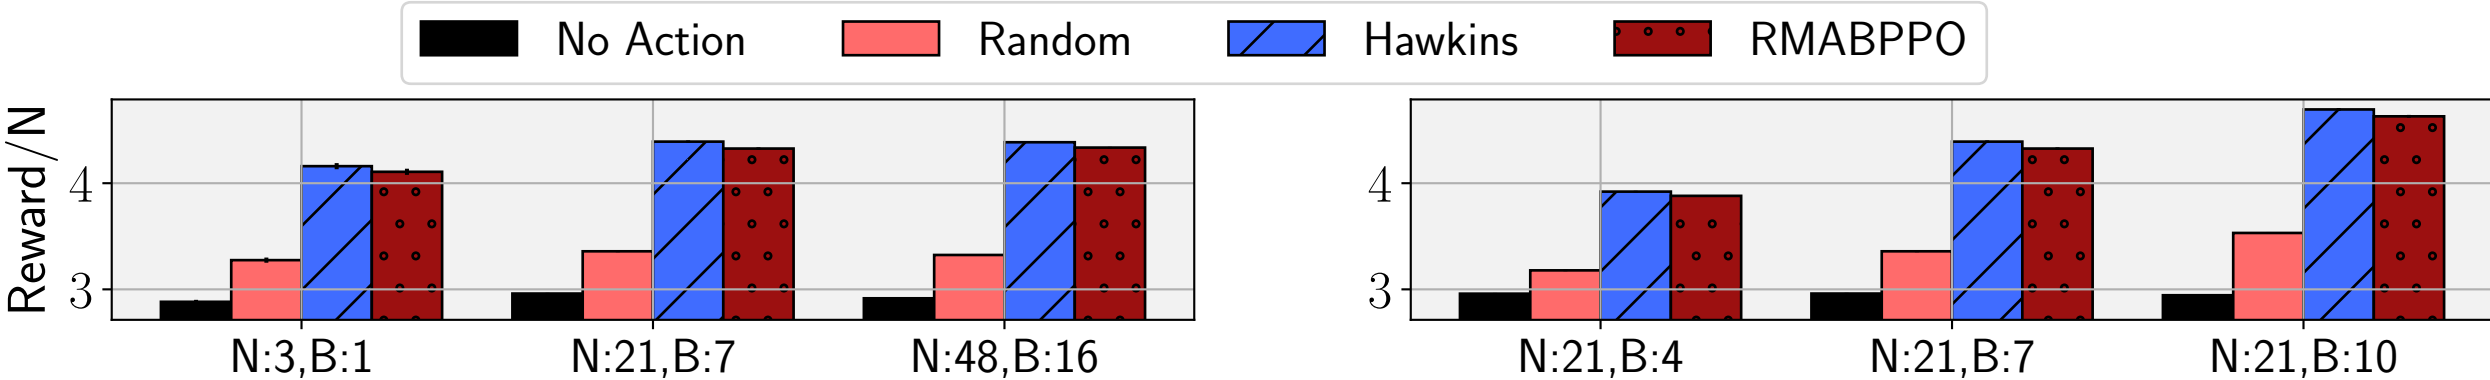

Supplement: supplementary_material [file attachment]

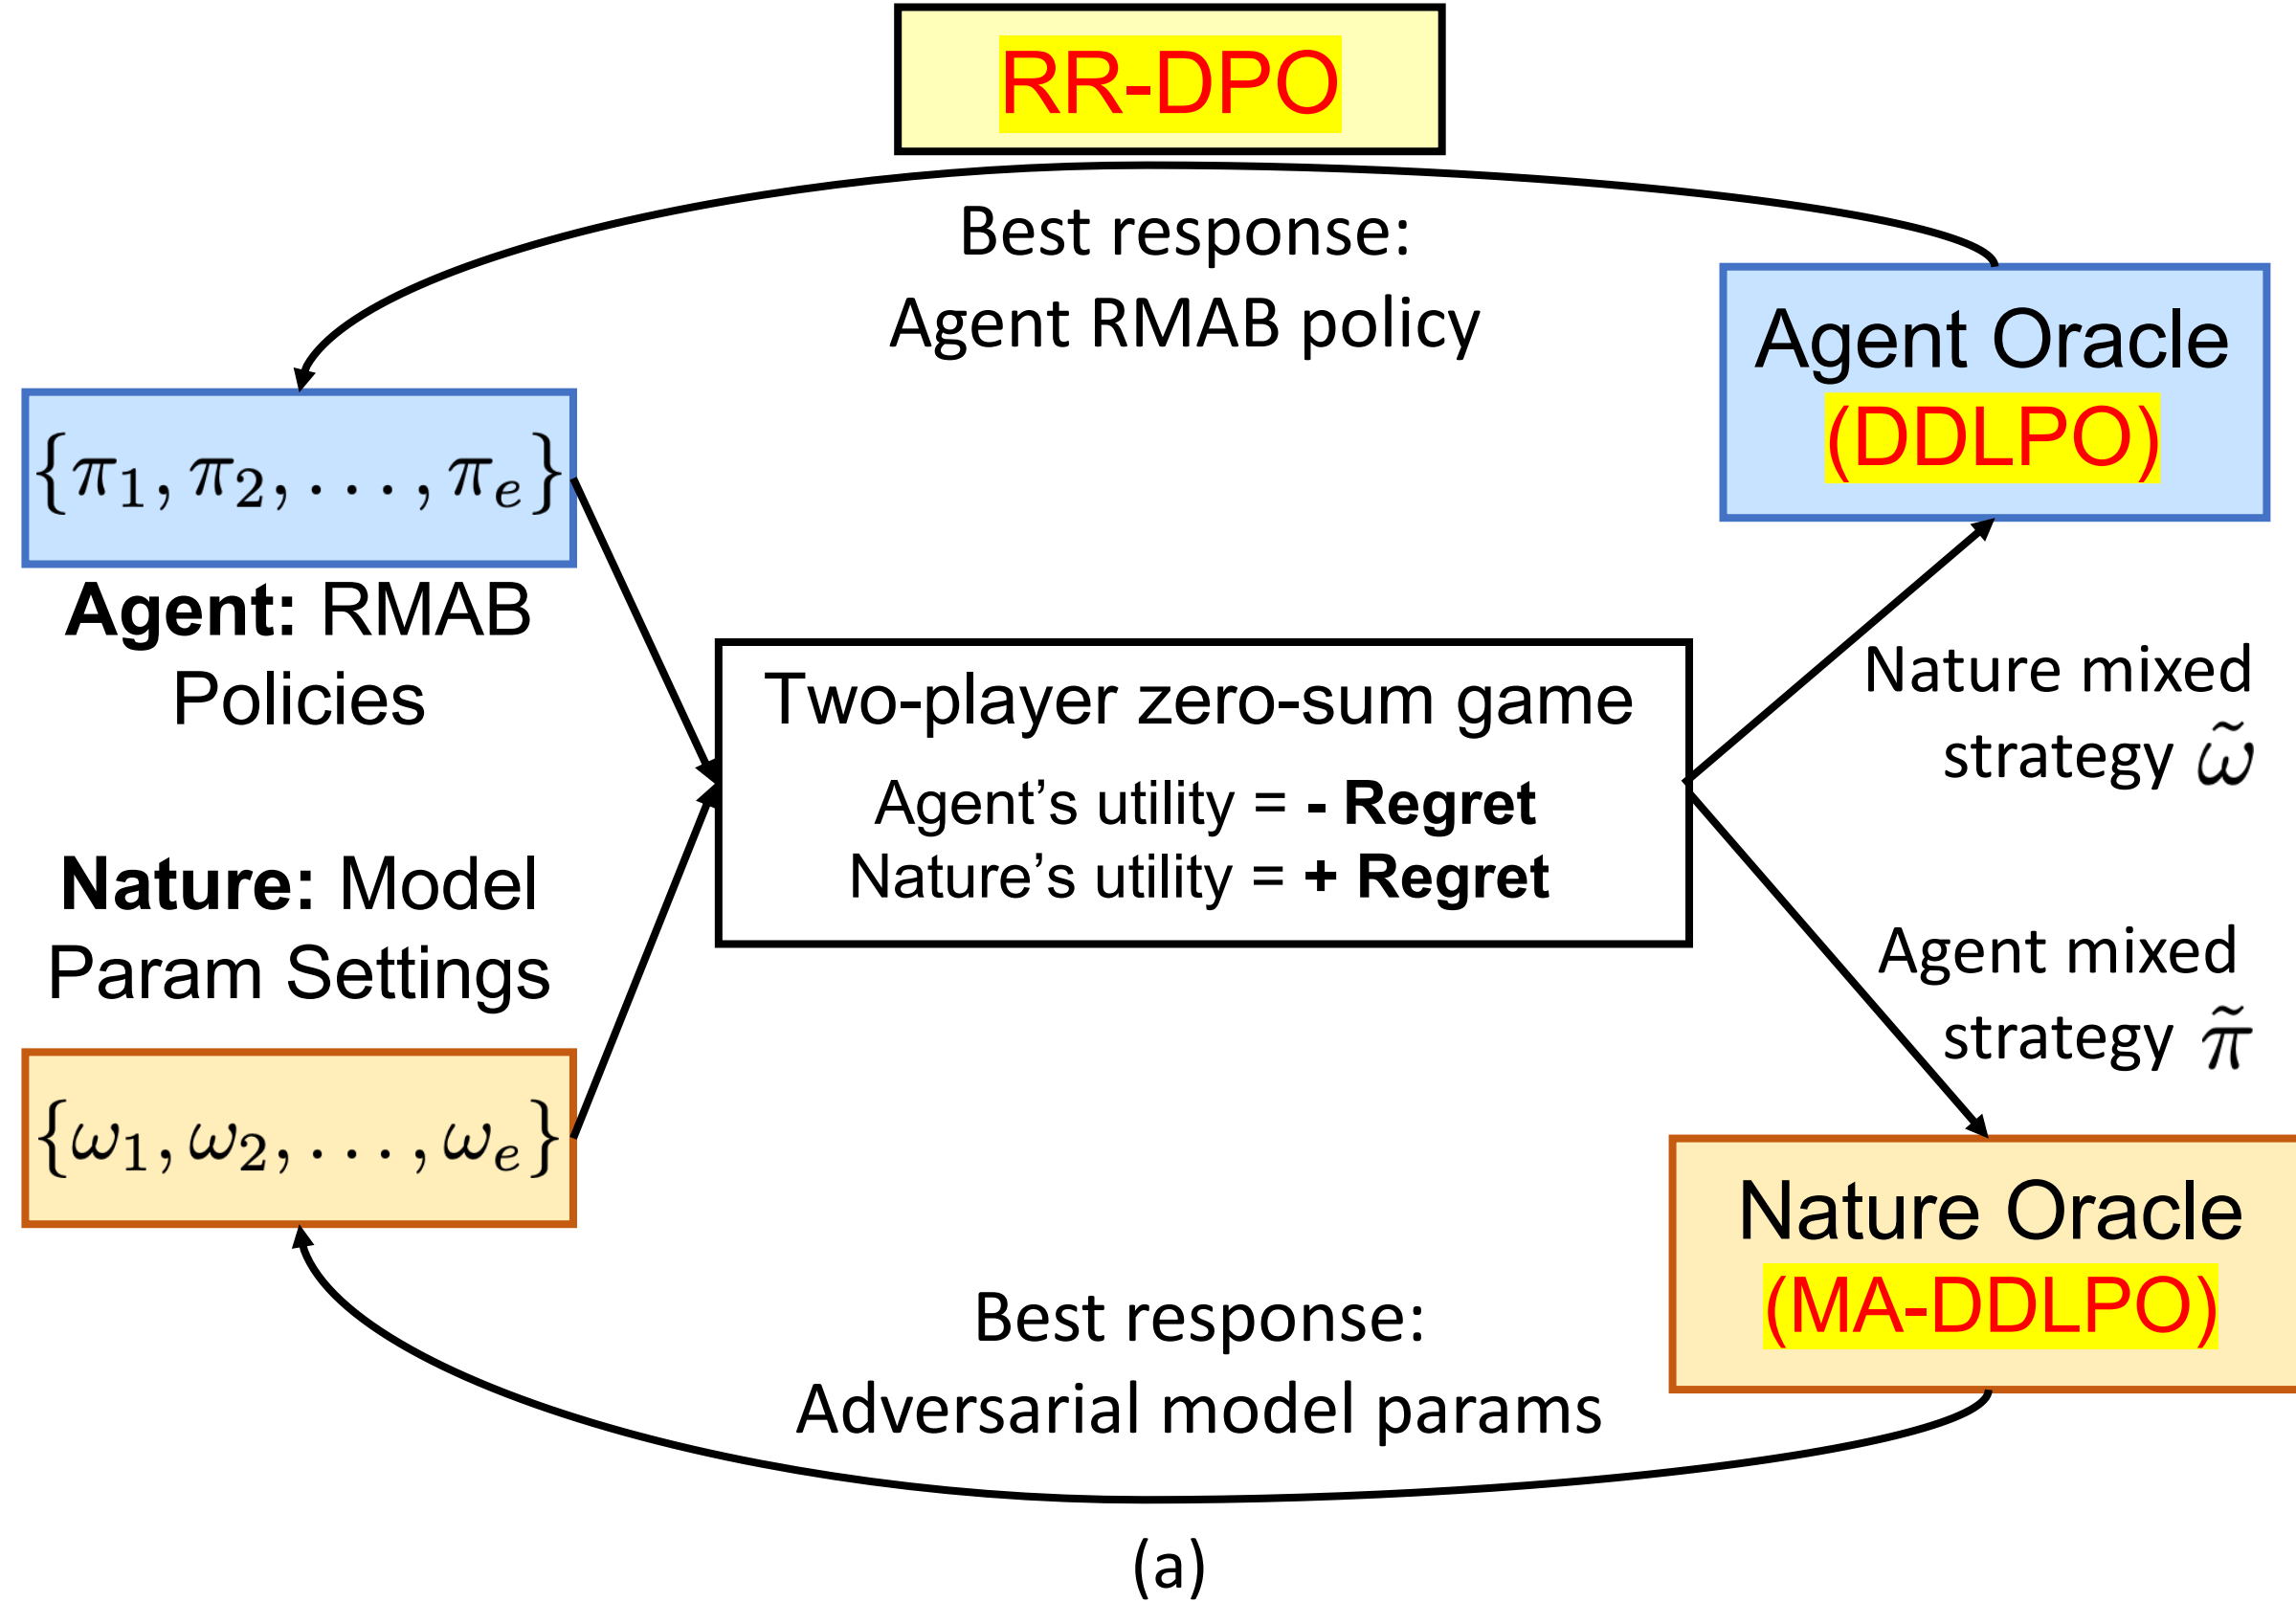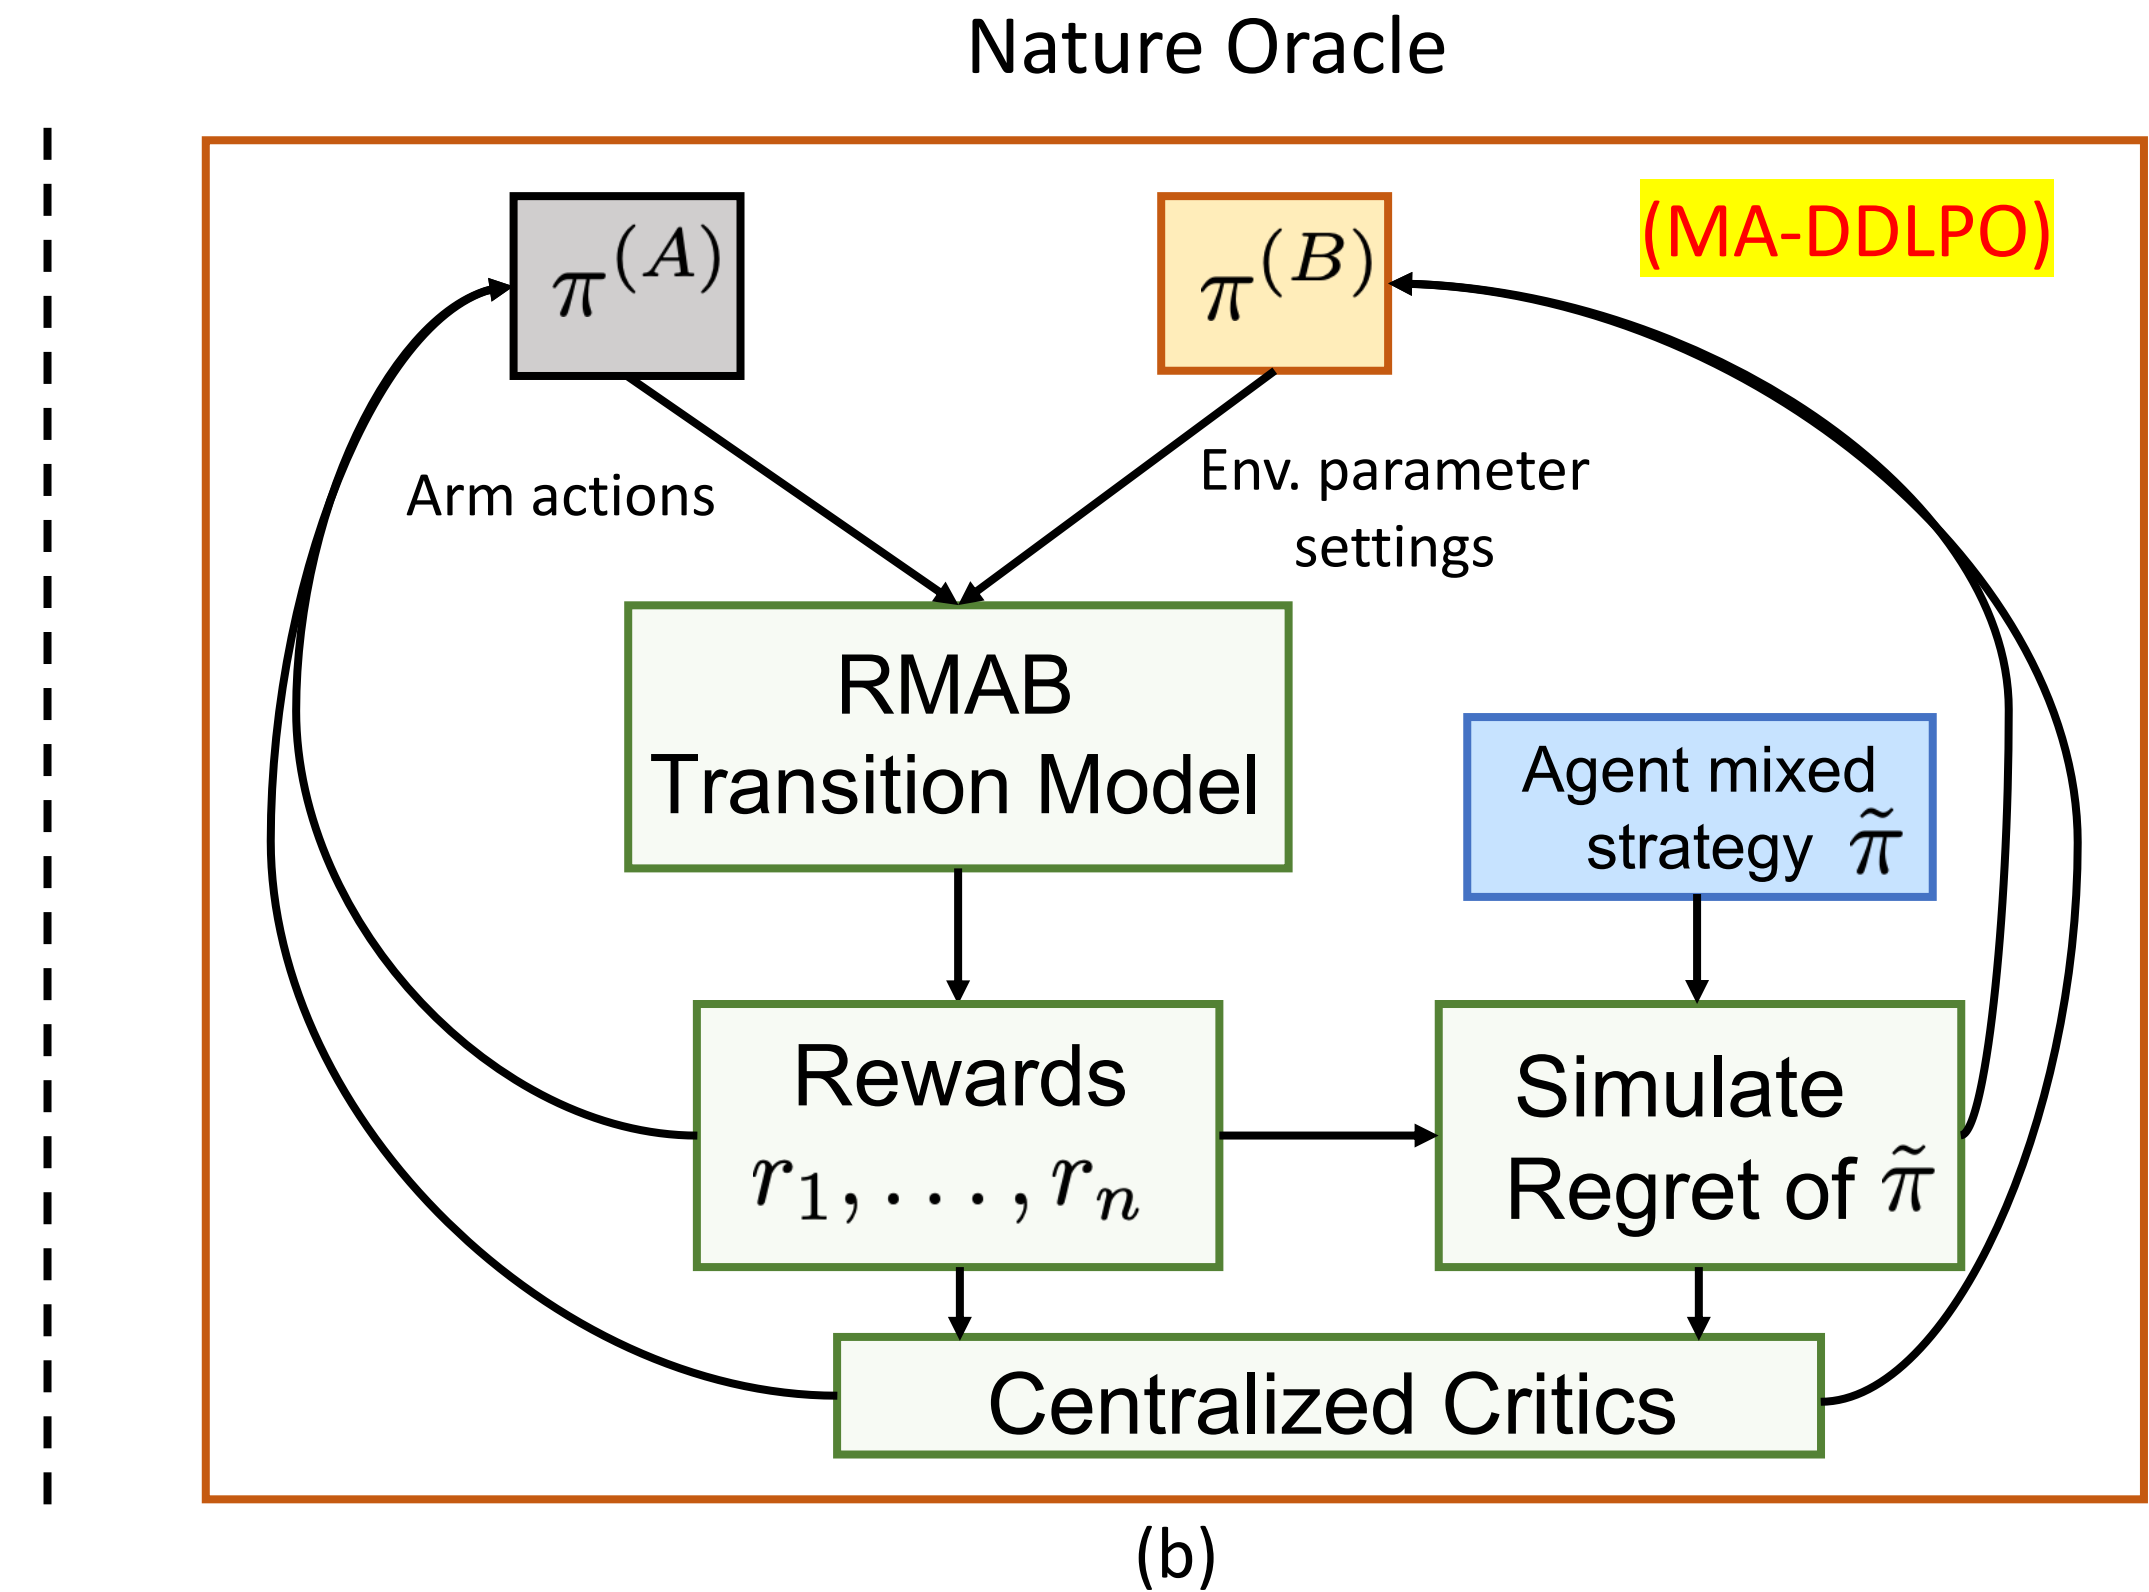

Supplement: supplementary_material [file attachment]
